# Supplementary material for: Overexpression of DCF1 inhibits glioma through destruction of mitochondria and activation of apoptosis pathway
Source: PubMed Central journal article supplement — Sci Rep. 2014 Jan 15;4:3702. doi: 10.1038/srep03702 (PMC3892183; doi:10.1038/srep03702), 2014-01-15

## **Overexpression of DCF1 inhibits glioma through destruction of mitochondria and activation of apoptosis pathway**

Yuqiong Xie<sup>a,b,\*</sup>, Qiang Li<sup>a,b,\*</sup>, Qingbo Yang<sup>a</sup>, Mei Yang<sup>a,b</sup>, Zhifeng Zhang<sup>a</sup>, Liucun Zhu<sup>b</sup>, Huang Yan<sup>a</sup>, Ruili Feng<sup>a</sup>, Shiqing Zhang<sup>a,b</sup>, Chen Huang<sup>a</sup>, Zengrong Liu<sup>b</sup>, Tieqiao Wen<sup>a,b,†</sup>

1 Laboratory of Molecular Neural Biology, School of Life Sciences, Shanghai University, Shanghai 200444, China.

2. Institute of Systems Biology, Shanghai University, Shanghai 200444, China.

\*These authors contributed equally to this paper.

†To whom correspondence should be addressed: Tieqiao Wen, Ph.D., Institute of Systems Biology, School of Life Sciences, Shanghai University, Shanghai 200444, China. Phone: (86)-021-66133819, tqwen@shu.edu.cn.

## Supplementary information

### Figure legends

Sup. 1. DCF1 is down-regulated in gliomas. **a.** Compare DCF1 expression level in low-grade and high grade astrocytoma from gene array GDS2853. **b.** Expression value of DCF1 between normal human astrocytes and U251 glioma cell lines. **c.** Semi-quantitative RT-PCR analysis of DCF1 in normal brain tissue and transplantation tumor of athymic nude mice. **d.** Intensity analysis of DCF1 in Semi-quantitative RT-PCR. **e.** Western analysis of DCF1 in normal brain tissue and transplantation tumor of athymic nude mice. (n=3 per group, \*P<0.05, \*\*P<0.01, \*\*\*P<0.001)

Fig. Sup. 2. **a.** Endogenous TMEM59 was detected in permeabilized HeLa cells with the DCF1 polyclonal antibody (green). **b.** Image of DCF1 and four mutants function on U251 cell lines invasion ability.

Fig. Sup. 3. **a.** Full length DCF1 induced the depolarization of mitochondria membrane potential in U87-MG glioma cell lines, but none of either mutant. **b.** Identification of glioma cell content by GFAP immunofluorescence in primary glioma cell isolated from planted tumors of three groups

Fig. Sup. 4. Possible mode of cell apoptosis mechanism induced by DCF1.

Sup. 1

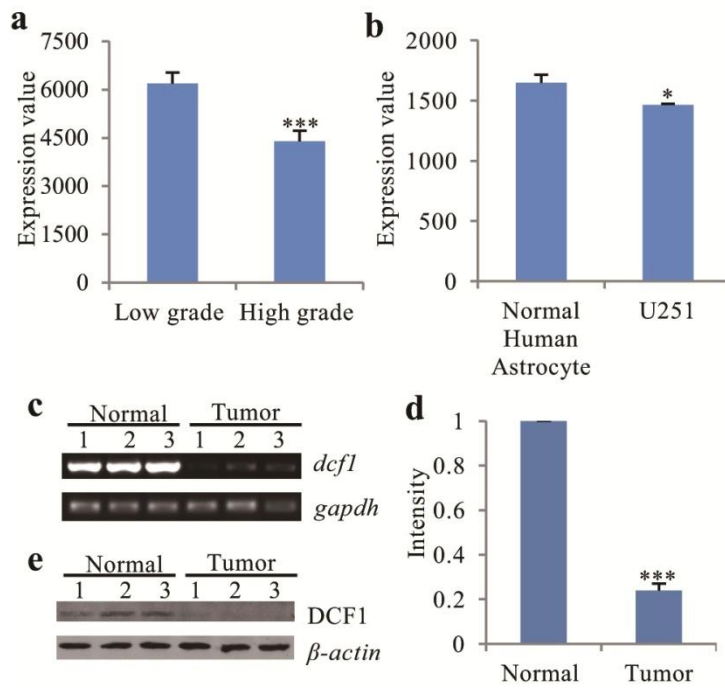

Sup.2

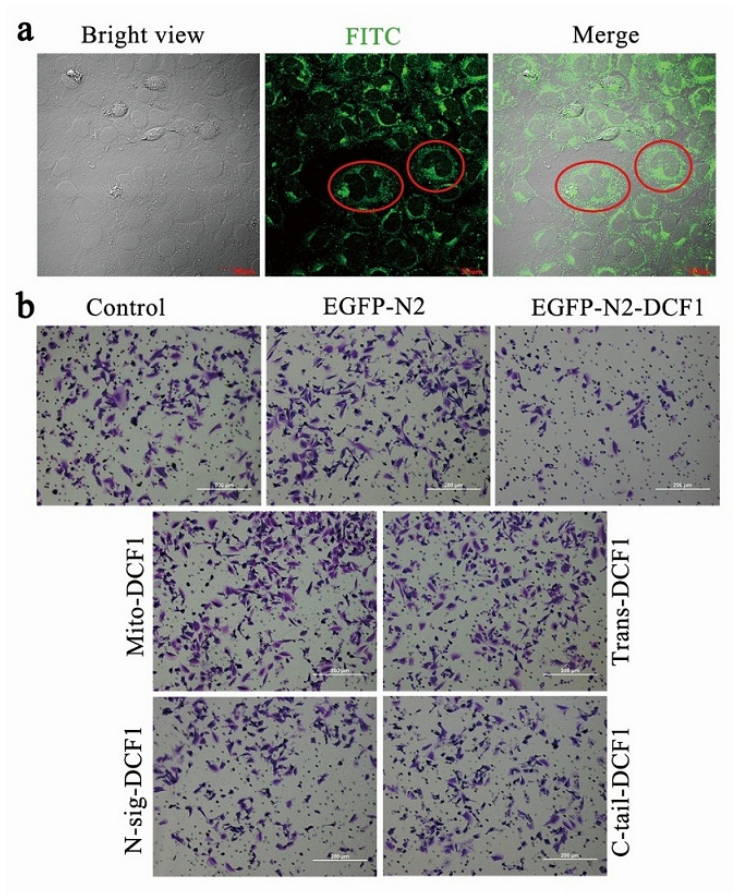

Sup.3

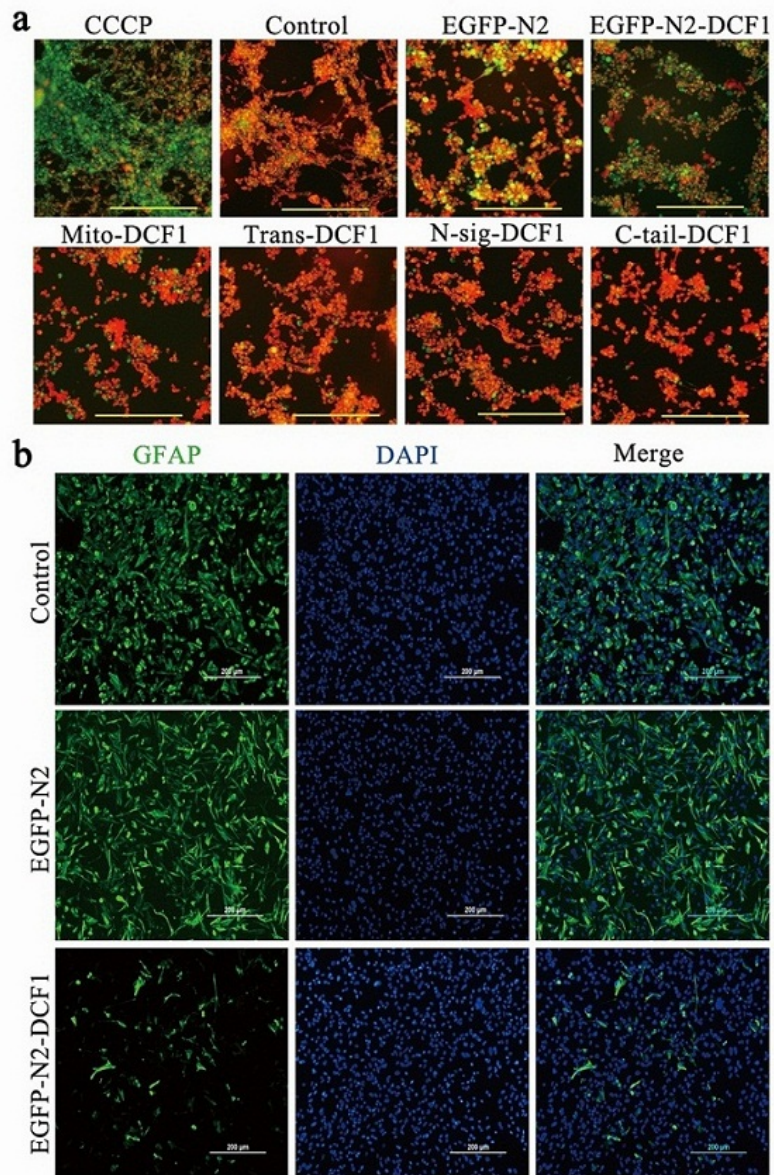

Sup.4

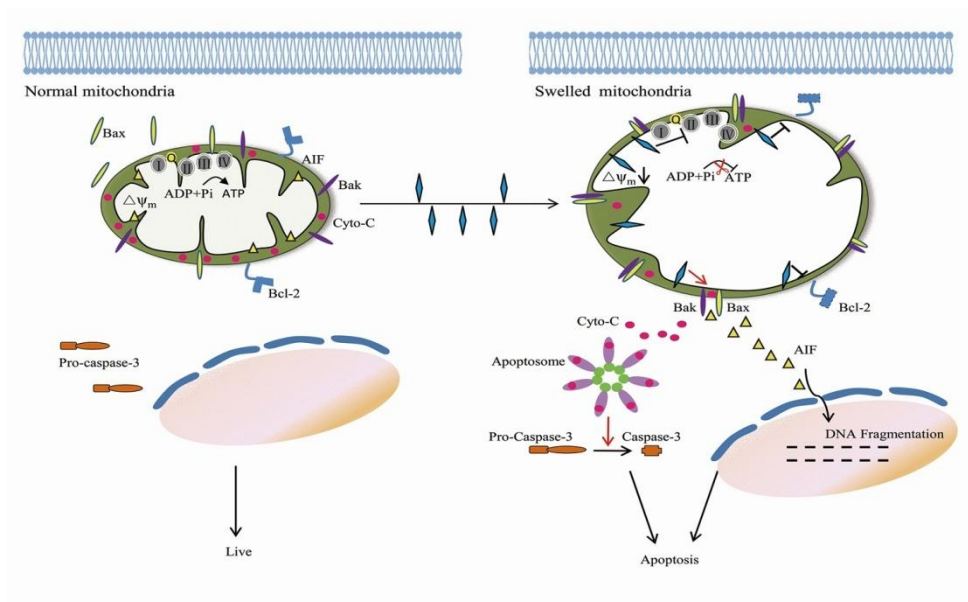

The full-length blots in Fig.4 a

Bcl2:

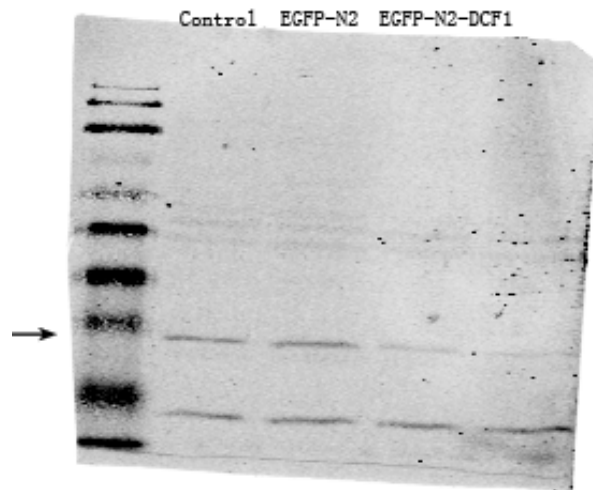

Bax:

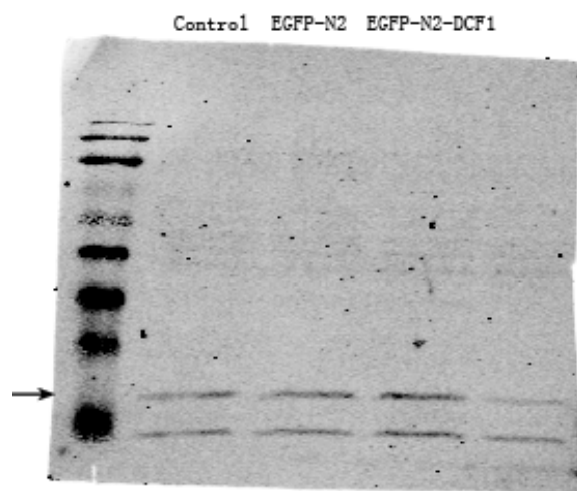

Procaspase-3

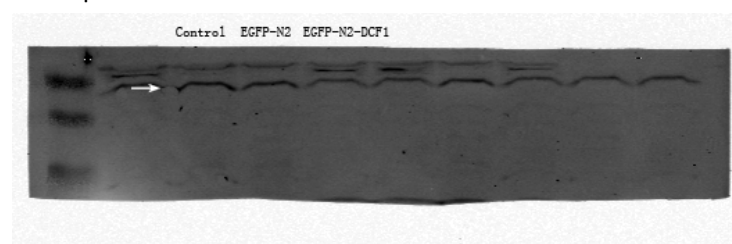

Caspase 3

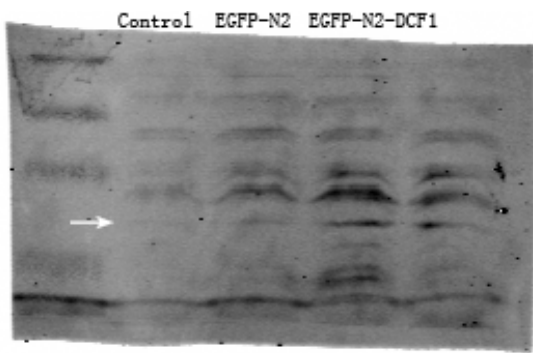

$\beta$ -actin

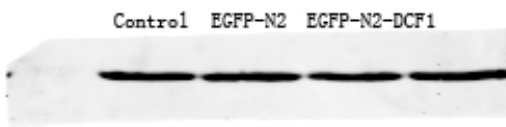

The full-length blots in Fig.5 B

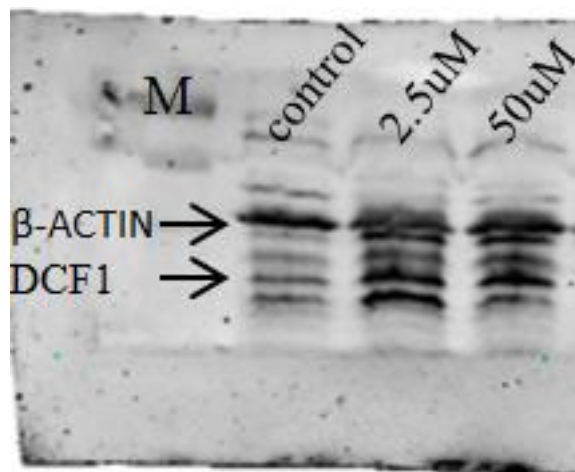

Supplement: srep03702-s1.pdf [file srep03702-s1.pdf]
